# Supplementary material
Source: MDPI journal article supplement (https://www.mdpi.com/2076-0760/8/3/72)
Supplement: s1 [file s1]

Archive with 2 entries (2 files):
- fig1 SI.tif
- Table 1 Supporting info.pdf
