# Supplementary material
Source: MDPI journal article supplement (https://www.mdpi.com/2076-0760/8/3/72)
Supplement: s1 [file s1 › Table 1 Supporting info.pdf]

**Table 1 Supporting Information Activities of University of the Aegean (UAeg) related to migrants support and education**

| Category              | Title                                                                             | Details                                                                                                                                                                                                                                                                                                                                                                                                                                                                                                                                                                                                                                                                                                                                                                                                                                                                                                                                                                        |
|-----------------------|-----------------------------------------------------------------------------------|--------------------------------------------------------------------------------------------------------------------------------------------------------------------------------------------------------------------------------------------------------------------------------------------------------------------------------------------------------------------------------------------------------------------------------------------------------------------------------------------------------------------------------------------------------------------------------------------------------------------------------------------------------------------------------------------------------------------------------------------------------------------------------------------------------------------------------------------------------------------------------------------------------------------------------------------------------------------------------|
| University Committee  | Integration s emigrants into the education system of UAeg-2015                    | The Senate of the University of the Aegean, taking into account the recommendation of the Working Group established by decision of the rector, Professor Stefanou Gkritzali, in order to investigate the recording conditions in parts of applicants (Persons falling under the criteria of Article 1 of the 1951 Geneva Convention) decided a series of actions aimed at providing for a legislative provision for the admission of refugee students in the departments of the University of the Aegean. The plan provides for the entry of Syria student refugees, except for Pan-Hellenic Examinations, in the schools of the Universities of Mytilene, Samos, Chios, Rhodes, Syros and Limnos                                                                                                                                                                                                                                                                              |
| Conference            | Contested Borderscapes Conference organized by UAeg                               | Transnational Geographies vis-à-vis Fortress Europe. Mytilene-Lesvos (Greece), September 28 – October 1, 2017<br><br>The island of Lesbos is a space of multiple histories of refugee passage, now reinvented as a “hot spot” in the contemporary European regime of migration management. The main aim of this international conference is to create a space of critical reflection in which academics, artists, and activists from different disciplines, backgrounds, and locations, can strategies, organise, and analyse the social landscapes of border-spaces such as this, and their reverberations for anti-border politics elsewhere.                                                                                                                                                                                                                                                                                                                                |
| University excursions | Visit the ‘Hot Spots’                                                             | Moria's First Reception Center, “Kara Tepe” and the “One Happy Family” of the Swiss Cross visited a group of students from the Department of Sociology at the University of the Aegean on Friday morning as part of the course "Sociology of Immigration". Approximately 50 students first entered Moria's "abbey" accompanied by their professor Nikos Xypolytes and the chairman of the Department of Sociology, Michalis Psimitis, where they met Moria's director Giannis Balpakakis.<br><a href="http://www.politikaesvos.gr/i-fitites-tou-panepistimiou-egeou-sta-kentra-ton-prosfygon/">http://www.politikaesvos.gr/i-fitites-tou-panepistimiou-egeou-sta-kentra-ton-prosfygon/</a>                                                                                                                                                                                                                                                                                     |
| School programs       | Children refugees participate in the educational program of UAeg in Teriad museum | A total of 28 young researchers, led by the "notes of Stratis Eleftheriadis", and for about an hour and a half were walking around the museum and trying to repair the lost works and then complete the mission with the paintings from that story that arrived at our places from a far-off kingdom. All this happened at the Museum - Teriad Library with 17 children refugees from the Hospitality Center of the Municipality of Lesbos in Kara Tepe and 11 children from the 1st Primary School of Mytilene. The small visitors attended the educational program of the Museolab Laboratory of the Department of Cultural Technology and Communication of the University of the Aegean, which this year organized and implemented a cycle of educational programs at the Museum - Teriad Library.<br><a href="http://www.real.gr/DefaultArthro.aspx?page=arthro&amp;id=610609&amp;catID=8">http://www.real.gr/DefaultArthro.aspx?page=arthro&amp;id=610609&amp;catID=8</a> |
| Summer school         | «Cultures, Migrations, Borders»                                                   | The last seven years the Department of Social Anthropology and History of the University of the Aegean and the Institute of Migration and Ethnic Studies of the University of Amsterdam welcome applications for the Postgraduate                                                                                                                                                                                                                                                                                                                                                                                                                                                                                                                                                                                                                                                                                                                                              |

|                                |                            |                                                                                                                                                                                                                                                                                                                                                                                                                                                                                                                                                                                                                                                                                                                                                                                                                                                                                                                                                                                                                                                                                                                                                                                                                                                                                                                                                                                                                                                                                                                                                                                                                 |
|--------------------------------|----------------------------|-----------------------------------------------------------------------------------------------------------------------------------------------------------------------------------------------------------------------------------------------------------------------------------------------------------------------------------------------------------------------------------------------------------------------------------------------------------------------------------------------------------------------------------------------------------------------------------------------------------------------------------------------------------------------------------------------------------------------------------------------------------------------------------------------------------------------------------------------------------------------------------------------------------------------------------------------------------------------------------------------------------------------------------------------------------------------------------------------------------------------------------------------------------------------------------------------------------------------------------------------------------------------------------------------------------------------------------------------------------------------------------------------------------------------------------------------------------------------------------------------------------------------------------------------------------------------------------------------------------------|
|                                |                            | <p>International Summer School ‘CULTURES, MIGRATIONS, BORDERS’ that will take place on the border island of LESVOS, GREECE.</p> <p>The program of the course is structured around five thematic axes:</p> <ul style="list-style-type: none"> <li>a. Theoretical and methodological issues in the study of migration and borders.</li> <li>b. Institutional and political aspects of the migratory condition.</li> <li>c. People on the move: immigrant groups, refugees and host communities.</li> <li>d. Cross-cultural encounters across borders and interactions of host/immigrant on the border.</li> <li>e. The politics of humanitarian aid and the 'refugee crisis'.</li> </ul> <p>Along with the seminars, the program includes some further activities. The participants will be given the opportunity to interact with citizens on the island assisting refugees and meet asylum seekers. A fieldtrip to Mytilene is organized for this purpose as well as some activities in Plomari. While acquainting themselves with the reality of migration on an Aegean island, participants will develop research skills and learn how to place their findings within wider local and global processes. Doctoral students and researchers will also have the opportunity to present their work at the PhD/Research Seminars. The Summer School includes also the public screening of films on migration and border-crossing. Lastly, it offers a variety of social and leisure activities.</p> <p><a href="https://summer-schools.aegean.gr/MigBord2017">https://summer-schools.aegean.gr/MigBord2017</a></p> |
| Support for the use of the OLS | UAeg Offer training in OLS | <p>The Erasmus + / IKY National Agency, after responding to a relevant call for expressions of interest, gave <b>the University of the Aegean</b> 2.000 language licenses / language learning licenses online to be granted to refugees in our islands. These language licenses allow refugees to attend on-line courses for learning a foreign language from the 12 available (Czech, Danish, Greek, English, French, German, Italian, Spanish, Dutch, Polish, Portuguese and Swedish). The aim of this action is to strengthen the language skills of refugees and to integrate them into European education and training systems. In this context, UAeg in co-operation with the UN High Commissioner for Refugees (UNHCR) organized the refugee support process fully and effectively to fully exploit this service.</p> <p>The Online Linguistic Support (OLS) service is a program of the European Commission initially designed for those taking part in the Erasmus + student exchange program and has been expanded rapidly to include asylum seekers. Online lessons are for people over the age of 12 and access is available from any device with internet connection. Once the program is completed within 13 months, asylum seekers receive a certificate from the European Commission.</p>                                                                                                                                                                                                                                                                                                       |

|                       |                                                              |                                                                                                                                                                                                                                                                                                                                                                                                                                                                                                                                                                                                                                                                                                                                                                                                                                                                                                                                                                                                                                                                                                                                                                                                     |
|-----------------------|--------------------------------------------------------------|-----------------------------------------------------------------------------------------------------------------------------------------------------------------------------------------------------------------------------------------------------------------------------------------------------------------------------------------------------------------------------------------------------------------------------------------------------------------------------------------------------------------------------------------------------------------------------------------------------------------------------------------------------------------------------------------------------------------------------------------------------------------------------------------------------------------------------------------------------------------------------------------------------------------------------------------------------------------------------------------------------------------------------------------------------------------------------------------------------------------------------------------------------------------------------------------------------|
| Hosting of training   | Hosting training in UAeg PC labs                             | SAP, in collaboration with the United Nations High Commissioner for Refugees (UNHCR), the Galway Training Center and non-profit organizations, is implementing for the first time in Greece and on European territory the Refugee Code Week (RCW) initiative. The UAeg offered the PC labs to support refugee training and run RCW in its premises.                                                                                                                                                                                                                                                                                                                                                                                                                                                                                                                                                                                                                                                                                                                                                                                                                                                 |
| Hosting of training   | Hosting training in UAeg PC labs                             | The project PRESS "Education and Support of refugees" was funded by the Hellenic Open University and the training of refugees was supported by UAeg. The UAeg offered the PC labs to support refugee training and run "PRESS" courses in its premises.                                                                                                                                                                                                                                                                                                                                                                                                                                                                                                                                                                                                                                                                                                                                                                                                                                                                                                                                              |
| Exhibition            | 'man nature is like the water; Nothing stops him'            | UAeg students organized and exhibition under the title 'man nature is like the water; Nothing stops him' inspired by the refugee crisis.                                                                                                                                                                                                                                                                                                                                                                                                                                                                                                                                                                                                                                                                                                                                                                                                                                                                                                                                                                                                                                                            |
| Social event          | «Our City, Our Home»- «Refugee Week», Manchester, 23/06/2017 | Museolab, is leaving for England to take part, in cooperation with the University of Manchester, at "Our City, Our Home" in the framework of the International Refugee Institute, "Refugee Week". These events start today Monday, June 19 and will last until Friday, June 23, 2017. The Museology Laboratory of the Department of Cultural Technology and Communication of the University of the Aegean, Museolab, throughout the previous months, was in constant communication with colleagues of the Museum's Studies at the University (MA Arts Management, Policy & Practice and MA Art Gallery and Museum Studies), transferring personal experiences of the students from the direct experience of the refugee crisis in Lesbos, as well as their experience from the exhibition "Man, my son, is like water. It stops nothing ... ", which was successfully presented in 2016, in Mytilene and in Technopolis of the Municipality of Athens. In the context of the Refugee Week events, Museolab participates in the "Home is ..." exhibition, screening a documentary film and participating in discussion panels, and making visits and contacts with people in his museums Manchester. |
| Seminar               | Refugees in the Aegean Archipelagos                          | A seminar about the organization of the daily life and the problems that the refugees are facing. It was organized by the Commerce Chamber of Lesbos in cooperation with the UAeg students newspaper «Aegean University Press» and with the cooperation of the Center for the Treatment of Dependent Persons (KETHEA) and the Unaccompanied Minor Refugee Hospitalization Unit «Villa Azadi» of the institution «The Thomitor».<br>The excellent work of «Villa Azadi» was in the center of the discussion and the significant gaps of the Greek refugee legislation.<br><a href="http://www.emprosnet.gr/emprosnet-archive/4bc770e4-95fd-44a1-8604-b16889a96b9a">http://www.emprosnet.gr/emprosnet-archive/4bc770e4-95fd-44a1-8604-b16889a96b9a</a>                                                                                                                                                                                                                                                                                                                                                                                                                                                |
| Cooperation agreement | UAeg and ELSTAT                                              | The university provides to the Greek Hellenic Statistical Service Infos related to the Aegean islands including statistical data of coming refugees                                                                                                                                                                                                                                                                                                                                                                                                                                                                                                                                                                                                                                                                                                                                                                                                                                                                                                                                                                                                                                                 |
| Social event          | Recycled art installation                                    | In June 6 (2016), University of the Aegean in Mytilene, Greece, opened its poignant exhibition "The Global Chess Board" to celebrate World Environment Day. Over the past year, the                                                                                                                                                                                                                                                                                                                                                                                                                                                                                                                                                                                                                                                                                                                                                                                                                                                                                                                                                                                                                 |

|                                         |                                                                                               |                                                                                                                                                                                                                                                                                                                                                                                                                                                                                                                                                                                                                                                                                                                                                                                                                                                                                                                                                                                                                                                                                                                                     |
|-----------------------------------------|-----------------------------------------------------------------------------------------------|-------------------------------------------------------------------------------------------------------------------------------------------------------------------------------------------------------------------------------------------------------------------------------------------------------------------------------------------------------------------------------------------------------------------------------------------------------------------------------------------------------------------------------------------------------------------------------------------------------------------------------------------------------------------------------------------------------------------------------------------------------------------------------------------------------------------------------------------------------------------------------------------------------------------------------------------------------------------------------------------------------------------------------------------------------------------------------------------------------------------------------------|
|                                         | from refugees crisis- The global chess board                                                  | <p>region has seen one of the greatest migrations in human history. “The personal drama encapsulated in each individual arriving has unfolded on the beaches across the islands of the Aegean Archipelago and left behind, bearing silent witness to lives changed forever, are their lifejackets,” <a href="#">the university said in a statement announcing the installation</a>. The two basic materials used in the installation are recycled — waste paper from university students and used refugee life jackets sourced from the Municipality of Lesvos. The two highly symbolic materials join to create an interactive installation meant to catalyze the fight against waste and inspire greater support for refugee communities.</p> <p><a href="http://www1.aegean.gr/aegean2/news/2015_16/deltia/skaki_press.html">http://www1.aegean.gr/aegean2/news/2015_16/deltia/skaki_press.html</a></p> <p><a href="http://www.triplepundit.com/special/rethink-reuse-savers/recycled-art-installations-around-world/">http://www.triplepundit.com/special/rethink-reuse-savers/recycled-art-installations-around-world/</a></p> |
| Language<br>s<br>examinati<br>on center | UAEG is a certified multilingual examination center                                           | The certification of English/Greek language is conducted by the University of the Aegean at the university unit of Mytilene. The University of the Aegean is a recognized testing center of the Greek Language Center (KEG) of the Ministry of Education, Research and Religious Affairs and carries out the examinations for the certification of proficiency in Greek language under the auspices of the KEG.                                                                                                                                                                                                                                                                                                                                                                                                                                                                                                                                                                                                                                                                                                                     |
| Summer school                           | Cultural Trauma: theoretical perspectives, empirical evidence, somatic responses - CuTrau2017 | <p>SCHOOL OF SOCIAL SCIENCES - Department of Sociology, 1 Jul 2017 to 8 Jul 2017<br/>Lesvos</p> <p><u>Topics:</u><br/>Greek attitudes toward refugees and immigrants, Author Nikos Nagopoulos</p> <p>The refugee situation in Greece and the role of the UN Refugee Agency (UNHCR), Author Stella Nanou</p> <p>Lives torn apart: Rehabilitating Syrian refugees from their torture. What can be done at the individual and public level, Author Christina Papadopoulou</p>                                                                                                                                                                                                                                                                                                                                                                                                                                                                                                                                                                                                                                                          |
| Conference                              | Crossing borders                                                                              | Conference, 7-10/07/2017, Lesvos, Organized by Cooperative Institute for Transnational Studies (C.I.T.S) University of the Aegean (Laboratory EKNEXA- Department of Sociology)                                                                                                                                                                                                                                                                                                                                                                                                                                                                                                                                                                                                                                                                                                                                                                                                                                                                                                                                                      |
