# Supplementary material
Source: MDPI journal article supplement (https://www.mdpi.com/2076-0760/8/3/72)

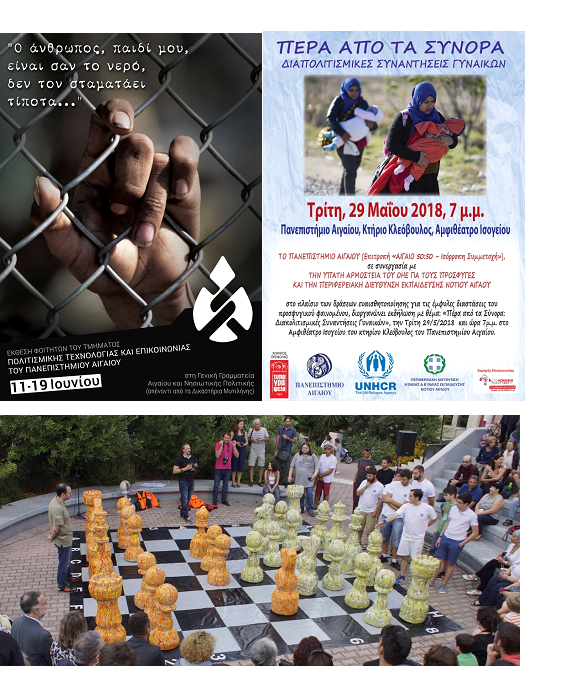

Supplement: s1 [file s1 › fig1 SI.tif]
